# Supplementary material for: Growth of 60 mm-diameter Yb:CNGG single crystals with disordered coordination structure for high-energy laser systems
Source: Royal Society of Chemistry journal article supplement (doi:10.1039/d3ce01151h), 2024-01-01
Supplement: d3ce01151h1.pdf [file d3ce01151h1.pdf]

## Supplement Information

### **Growth of 60-mm-diameter Yb:CNGG single crystal with disordered coordination structure towards high-energy laser systems**

Xiaoheng Li, Dazhi Lu,\* Shuxian Wang,\* Kui Wu, Haohai Yu, Jing Li, and Huaijin Zhang  
State Key Laboratory of Crystal Materials and Institute of Crystal Materials, Shandong University, Jinan 250100, China

Corresponding Authors\*

**Dazhi Lu**-Email: dazhi.lu@sdu.edu.cn

**Shuxian Wang**-Email: shuxianwang@sdu.edu.cn

**Table S1** Data collection and refined parameters of Yb:CNGG crystals

| <b>Yb:CNGG</b>                           |                                                              |
|------------------------------------------|--------------------------------------------------------------|
| space group                              | <i>Ia-3d</i>                                                 |
| unit cell dimensions (Å)                 | $a = b = c = 12.4945(10)$                                    |
|                                          | $\alpha (^{\circ}) = \beta = \gamma = 90$                    |
| cell volume (Å <sup>3</sup> )            | 1950.55(5)                                                   |
| Z                                        | 8                                                            |
| temperature (K)                          | 293(2)                                                       |
| crystal size (mm <sup>3</sup> )          | 0.164×0.087×0.057                                            |
| radiation                                | Mo $K_{\alpha}$                                              |
| 2 $\theta$ range for data collection (°) | 7.990-54.820                                                 |
| index ranges                             | $-16 \leq h \leq 11, -16 \leq k \leq 11, -15 \leq l \leq 16$ |
| reflections collected                    | 2751                                                         |
| goodness-of-fit on $F^2$                 | 1.046                                                        |
| <i>R</i>                                 | 0.0178                                                       |
| <i>R<sub>w</sub></i>                     | 0.0558                                                       |

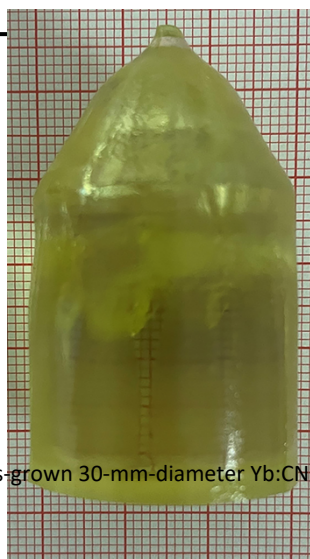

**Fig. S1.** As-grown 30-mm-diameter Yb:CNGG crystal.

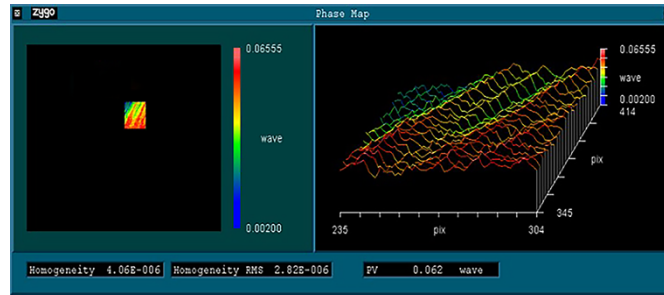

**Fig. S2.** Optical uniformity analysis of Yb:CNGG crystal (3×3 mm<sup>2</sup>).
